# Supplementary material for: Spatiotemporal Rhythmic Seizure Sources Can be Imaged by means of Biophysically Constrained Deep Neural Networks
Source: bioRxiv or medRxiv preprint supplement (doi:10.1101/2023.11.30.23299218), 2023-12-01
Supplement: Supplementary file [file media-1.pdf]

## **Supplementary Information of**

# **Spatiotemporal Rhythmic Seizure Sources Can be Imaged by means of Biophysically Constrained Deep Neural Networks**

Rui Sun<sup>1</sup>, Abbas Sohrabpour<sup>1</sup>, Boney Joseph<sup>2</sup>, Gregory Worrell<sup>2</sup>, Bin He<sup>1,3,\*</sup>

1. Department of Biomedical Engineering, Carnegie Mellon University, Pittsburgh, PA
2. Department of Neurology, Mayo Clinic, Rochester, MN
3. Neuroscience Institute, Carnegie Mellon University, Pittsburgh, PA

\* Correspondence:

Bin He, PhD

Carnegie Mellon University

Department of Biomedical Engineering

5000 Forbes Avenue, Pittsburgh, PA 15213, USA

Email: [bhe1@andrew.cmu.edu](mailto:bhe1@andrew.cmu.edu)

**Table S1**

| <b>Patient information</b> |        |                                                                |                                                                                 |           |         |                   |
|----------------------------|--------|----------------------------------------------------------------|---------------------------------------------------------------------------------|-----------|---------|-------------------|
| Pt. #                      | Gender | Surgical Resection                                             | Intracranial EEG                                                                | Follow-up | Outcome | Surgery age range |
| 1                          | F      | Right anterior temporal lobectomy and amygdalohippocampectomy  | Right temporal grids and strips and depth electrodes on mesial side             | 1 year    | ILAE-1  | 31-35             |
| 2                          | M      | Right anterior temporal lobectomy and hippocampectomy          | Bilateral depth electrodes into hippocampi                                      | 3 years   | ILAE-1  | 26-30             |
| 3                          | F      | Left anterior temporal lobectomy and amygdalohippocampectomy   | Left frontal and temporal grids and strips and depth electrodes on mesial side  | 3 years   | ILAE-1  | 26-30             |
| 4                          | F      | Left anterior temporal lobectomy and amygdalohippocampectomy   | Left temporal strips and mesial depth electrodes                                | 32 months | ILAE-1  | 21-25             |
| 5                          | F      | Left anterior frontal lobe excision                            | N.A.                                                                            | 30 months | ILAE-1  | 21-25             |
| 6                          | F      | Right anterior temporal lobectomy and amygdalohippocampectomy  | Right temporal grids and strips and depth electrodes on mesial side             | 1 year    | ILAE-1  | 21-25             |
| 7                          | F      | Left anterior temporal lobectomy and amygdalohippocampectomy   | Left frontal and temporal grids and strips and mesial depth electrodes          | 1 year    | ILAE-2  | N.A.              |
| 8                          | F      | Right temporal lobectomy and amygdalohippocampectomy           | N.A.                                                                            | 2 years   | ILAE-2  | 46-50             |
| 9                          | F      | Right temporal lobectomy and amygdalohippocampectomy           | Right temporal grids and strips and depth electrodes on mesial side             | 1 year    | ILAE-1  | 16-20             |
| 10                         | F      | Left temporal lobectomy and amygdalohippocampectomy            | N.A.                                                                            | 32 months | ILAE-1  | 56-60             |
| 11                         | F      | Left temporal lobectomy and amygdalohippocampectomy            | Right temporal grids and strips and depth electrodes on mesial side             | 1 year    | ILAE-1  | 51-55             |
| 12                         | F      | Right temporal lobectomy and amygdalohippocampectomy           | Right temporal grids and strips and depth electrodes on mesial side             | 1 year    | ILAE-1  | 21-25             |
| 13                         | F      | Extended right temporal lobectomy with amygdalohippocampectomy | Multiple right lateral temporal and sub-temporal grids and strips of electrodes | 15 months | ILAE-1  | 36-40             |

|    |   |                                                               |                                                                                                                                                         |           |        |       |
|----|---|---------------------------------------------------------------|---------------------------------------------------------------------------------------------------------------------------------------------------------|-----------|--------|-------|
| 14 | M | Right temporal lobectomy and amygdalohippocampectomy          | Right temporal grids and strips and depth electrodes on mesial side                                                                                     | 1.5 years | ILAE-1 | 46-50 |
| 15 | M | Right anterior temporal lobectomy and amygdalohippocampectomy | Right temporal grids and strips and depth electrodes on mesial side                                                                                     | 1 year    | ILAE-1 | 51-55 |
| 16 | F | Left parietal focal cortical resection                        | Right temporal grids and strips and depth electrodes on mesial side                                                                                     | 1 year    | ILAE-1 | 21-25 |
| 17 | M | Modified left frontal lobectomy                               | Left frontal strips                                                                                                                                     | 19 months | ILAE-1 | 21-25 |
| 18 | M | Right temporal lesion resection                               | N.A.                                                                                                                                                    | 19 months | ILAE-1 | 46-50 |
| 19 | F | Right frontal cortical resection                              | Right frontal, orbital frontal, and bilateral interhemispheric grid/strips/depth electrodes                                                             | 14 months | ILAE-1 | 11-15 |
| 20 | F | Left anterior temporal lobectomy and amygdalohippocampectomy  | Left parietal, left temporal mesial, and lateral neocortical region depth, subdural grid, and strip electrodes                                          | 16 months | ILAE-1 | 21-25 |
| 21 | M | Right mesial frontal orbital lobe excision                    | Bilateral temporal and frontal depth electrodes                                                                                                         | 15 months | ILAE-1 | 21-25 |
| 22 | M | Right frontotemporal lobe resection                           | Right temporoparietal and right parietal grid, right temporal depth electrodes                                                                          | 11 months | ILAE-5 | 21-25 |
| 23 | M | Right temporal lobectomy and amygdalohippocampectomy          | Bitemporal depth electrodes                                                                                                                             | 8 months  | ILAE-4 | 36-40 |
| 24 | F | Right temporal lobectomy and amygdalohippocampectomy          | Right temporal strips and mesial temporal depth electrodes                                                                                              | 19 months | ILAE-3 | 46-50 |
| 25 | M | Right anterior temporal lobectomy and amygdalohippocampectomy | Right temporal strips and mesial temporal depth electrodes                                                                                              | 18 months | ILAE-4 | 26-30 |
| 26 | F | Left anterior temporal lobectomy and amygdalohippocampectomy  | Left temporal grid and strips on the inferior temporal side and left frontal, depth electrodes on temporal and frontal                                  | 12 months | ILAE-4 | 21-25 |
| 27 | F | Focal temporo-occipital cortical resection                    | Right fronto-temporal grids and strips and depth electrodes close to amygdala and hippocampus, and later right posterotemporo-parietal grids and strips | 12 months | ILAE-4 | 21-25 |

|    |   |                                                                                                              |                                                                           |           |        |       |
|----|---|--------------------------------------------------------------------------------------------------------------|---------------------------------------------------------------------------|-----------|--------|-------|
| 28 | M | Right temporal lobectomy and amygdalohippocampectomy                                                         | Right temporal strips                                                     | 13 months | ILAE-4 | 26-30 |
| 29 | F | Left temporal lobectomy and amygdalohippocampectomy                                                          | left temporal strips and mesial depth electrodes                          | 15 months | ILAE-4 | 56-60 |
| 30 | F | Left anterior temporal lobectomy and amygdalohippocampectomy                                                 | Left temporal strips and electrodes                                       | 12 months | ILAE-3 | N.A.  |
| 31 | M | Lateral temporal extending into parietal cortex resection                                                    | Left subdural grids, strips, and depth electrodes                         | 14 months | ILAE-5 | 31-35 |
| 32 | M | Posterior superior margin of the sylvian fissure resection                                                   | Right subdural grids, strips, and depth electrodes                        | 15 months | ILAE-5 | 36-40 |
| 33 | M | Left anterior temporal lobectomy, amygdalohippocampectomy, and left posterior temporo-occipital corticectomy | Left temporal subdural grids, strip electrodes, and left depth electrodes | 15 months | ILAE-3 | 46-50 |

---

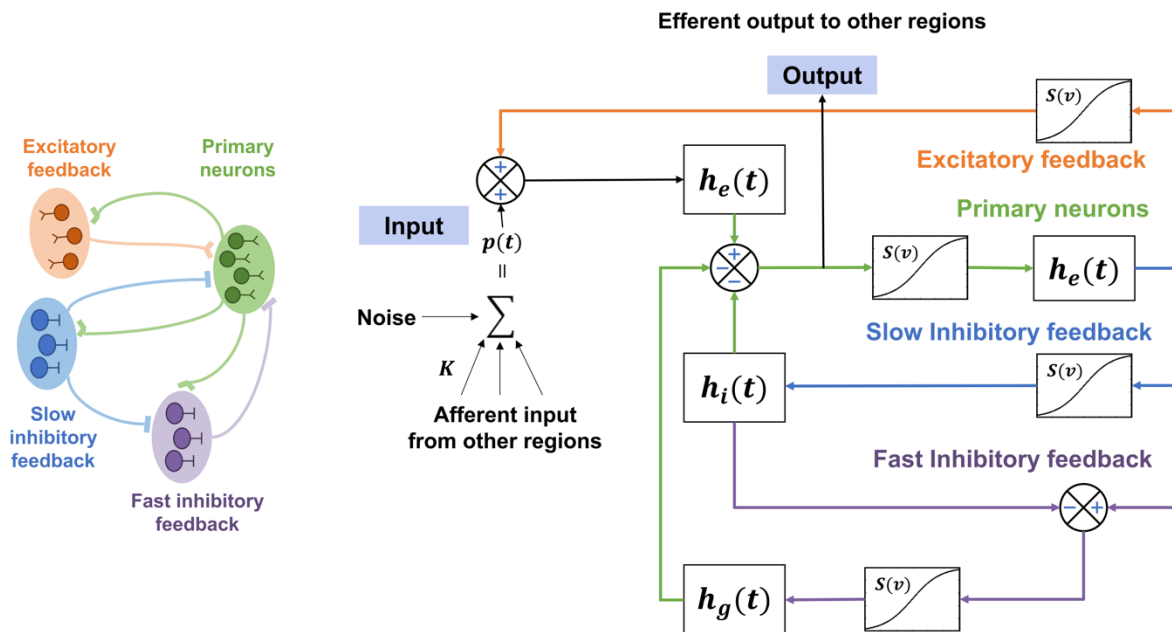

**Figure S1.** A single-element modified Jansen-Rit model simulates four neuronal sub-populations: the primary neurons (i.e., pyramidal cells), as well as excitatory, slow inhibitory and fast inhibitory interneurons. The influence from other neural ensembles is modeled as an excitatory input  $p(t)$  that represents the average pulse density, i.e., average firing rate, of afferent action potentials. The behavior of each subpopulation is modeled using linear functions  $h(t)$  that describe how presynaptic information, from excitatory and inhibitory populations, is transformed into postsynaptic information, and nonlinear function  $S(v)$  that models the change from average membrane potential of the subpopulation to average pulse density.

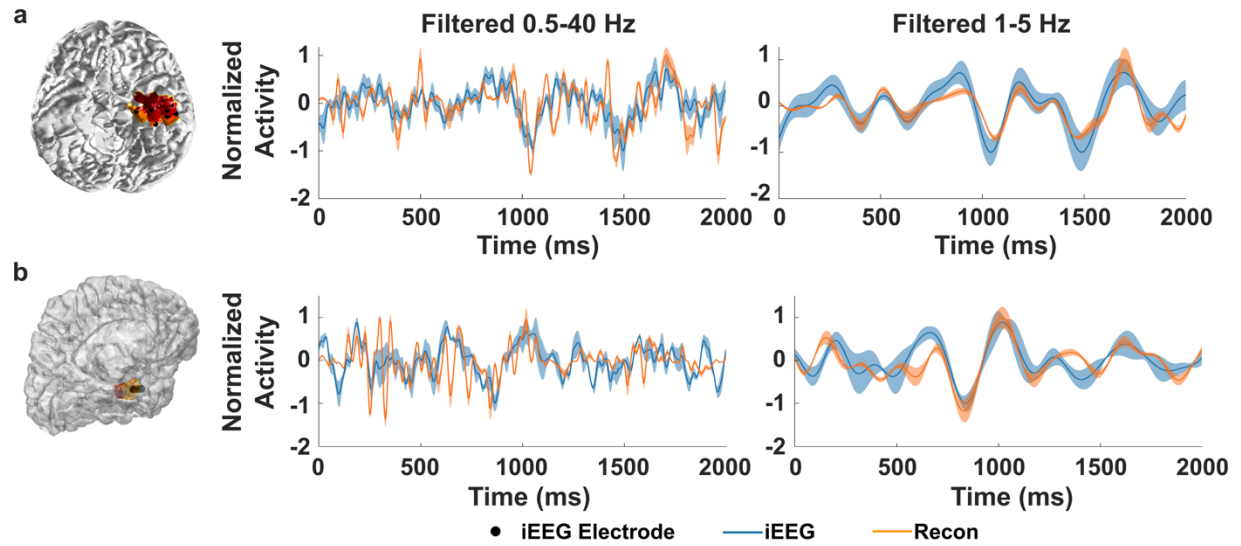

**Figure S2.** Comparing estimated time-courses from EEG to intracranial EEG recordings in 2 patients. The reconstructed time-courses near the SOZ electrodes from DeepSIF were averaged and compared to the averaged iEEG traces. The major ictal frequency for these patients is around 3 Hz. **a**, The linear correlation between the iEEG and reconstruction is 0.5 for wide-band signal, and 0.84 for narrow-band signal filter around the major frequency. **b**, The linear correlation between the iEEG and reconstruction is 0.4 for wide-band signal, and 0.77 for narrow-band signal filter around the major frequency.

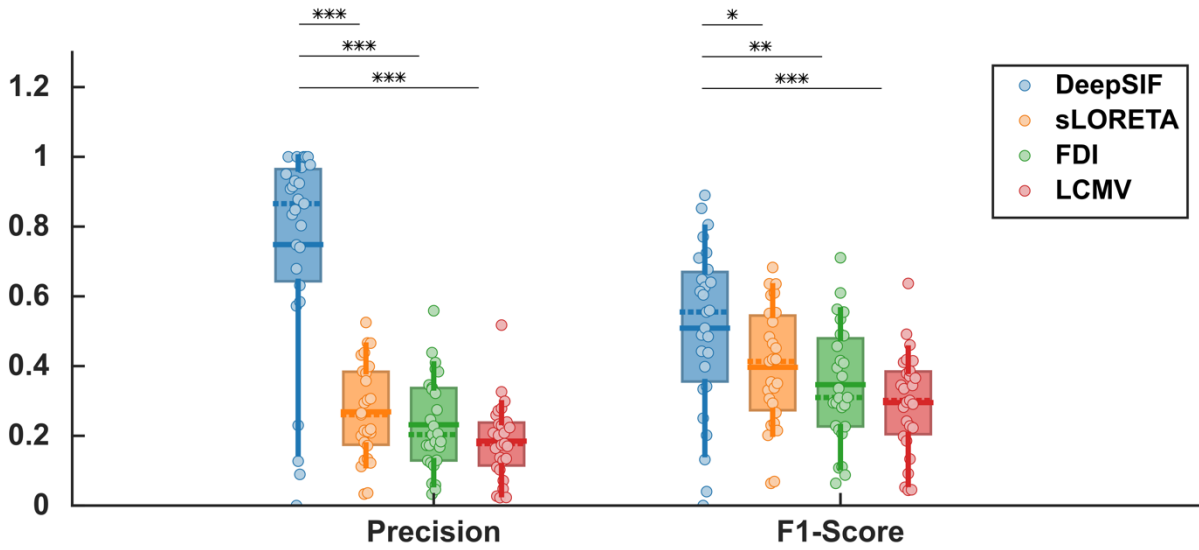

**Figure S3.** Precision and F1-Score for different ictal source imaging methods. Paired one-sided Wilcoxon signed rank test was used with statistical significance cutoffs of (\* $P < 0.05$ , \*\* $P < 0.01$ , \*\*\* $P < 0.001$ ).

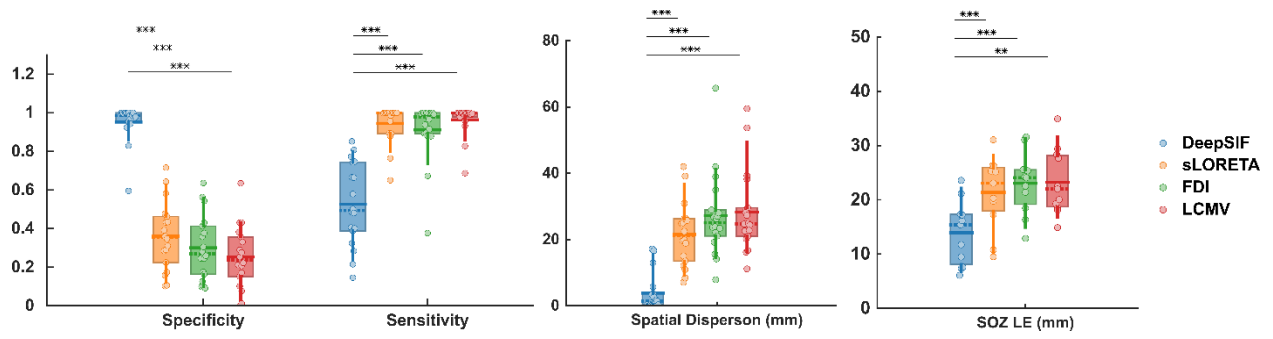

**Figure S4.** Ictal source imaging results for different ictal imaging methods in the seizure free group. Paired one-sided Wilcoxon signed rank test was used with statistical significance cutoffs of (\* $P < 0.05$ , \*\* $P < 0.01$ , \*\*\* $P < 0.001$ ).
